# Chromatin packaging and morphology in ejaculated human spermatozoa: evidence of hidden anomalies in normal spermatozoa

Patrizia Grace Bianchi<sup>1</sup>, Gian Carlo Manicardi<sup>2</sup>, Françoise Urner<sup>1</sup>, Aldo Campana<sup>1</sup> and Denny Sakkas<sup>1,3</sup>

<sup>1</sup>Clinic for Infertility and Gynaecological Endocrinology-WHO Collaborating Centre, Hôpital Cantonal Universitaire de Genève, 20 rue Alcide-Jentzer, 1211 Genève 14, Switzerland, and <sup>2</sup>Department of Animal Biology, University of Modena, Modena, Italy

<sup>3</sup>To whom correspondence should be addressed

**This study aimed to investigate the association between anomalies in sperm chromatin packaging, morphology and fertilization in patients undergoing routine in-vitro fertilization (IVF) or subzonal insemination (SUZI). Sperm chromatin packaging was assessed using chromomycin A<sub>3</sub> (CMA<sub>3</sub>), a fluorochrome specific for guanine-cytosine rich sequences of DNA. One hundred to 150 sperm cells were assessed in 55 patients to compare sperm chromatin packaging and morphology to fertilization after IVF or SUZI. When the morphology and CMA<sub>3</sub> fluorescence of individual spermatozoa was assessed, >75% of the macrocephalic sperm fluoresced in all patients. In contrast, a mean of 37% of the spermatozoa with normal morphology fluoresced in IVF patients compared with 58% of the normal spermatozoa in male factor patients treated by SUZI. SUZI patients displaying a high fluorescence (>70%) in their spermatozoa also had a significantly lower fertilization rate. Lower packaging quality in morphologically normal spermatozoa may represent a major limiting factor in the fertilizing ability of male factor patients. This study confirms that a high percentage of CMA<sub>3</sub> positivity is present in certain forms of male factor infertility and that such a test may be used to distinguish separate populations in morphologically normal spermatozoa.**

**Key words:** chromatin/chromomycin A<sub>3</sub>/in-vitro fertilization/male infertility/spermatozoa

## Introduction

Semen quality is conventionally determined according to the number, motility and morphology of spermatozoa in an ejaculate (World Health Organization, 1989). In turn, it is generally accepted that an association exists between these semen parameters and fertilizing ability (Mahadevan and Trounson, 1984; Kruger *et al.*, 1986; Liu *et al.*, 1988). Sperm morphology, in particular, seems to be the most significantly related parameter to fertilization rates (Pousette *et al.*, 1986; Oehninger *et al.*, 1988). With the advent of in-vitro fertilization (IVF) and related techniques such as subzonal insemination (SUZI) and intracytoplasmic sperm injection (ICSI), it has become increasingly apparent that the number, motility and morphology of spermatozoa are not always indicative of a male's fertility status. Significantly different fertilization rates have been reported for patients with similar semen parameters, suggesting that a more sensitive test is needed to identify the inherent defects which render certain spermatozoa unable to fertilize (Jeyendran *et al.*, 1989; Wolf *et al.*, 1992).

A failure of the conventional semen parameters to predict fertilization indicates that hidden anomalies, lying at the sperm membrane level or at the chromatin level, should also be evaluated. A number of studies have shown that spermatozoa with abnormal nuclear chromatin organization are more frequent in infertile men than in fertile men (Evenson *et al.*, 1980; Monaco and Rasch, 1982; Foresta *et al.*, 1992). In these studies, specific dyes and fluorochromes were used to assess

the chromatin of mature mammalian spermatozoa and relate them to fertilization results. The accessibility of specific dyes and fluorochromes to DNA can give clues to the packaging of the chromatin, which occurs during spermiogenesis. However, the targets of these fluorochromes or dyes vary and may not be adequate in identifying specific anomalies in chromatin structure. For example, Monaco and Rasch (1982) compared DNA fluorochromes specific for GC-rich sequences, mithramycin and chromomycin A<sub>3</sub> (CMA<sub>3</sub>), and for AT-rich sequences, 2'-[4-hydroxyphenyl]-5-[4-methyl-1-piperazinyl]-2,5'-bi-1H-benzimidazole and 4-6, diamidino-2-phenylindole. They concluded that, although fluorescence was evident in spermatids and spermatocytes, a decline in staining with GC-specific dyes during maturation probably reflected changes in protein composition and DNA packaging ratios.

In our own studies (Bianchi *et al.*, 1993), we have found that the amount of protamines present in mature spermatozoa represented at least one of the limiting factors controlling the accessibility of CMA<sub>3</sub> to the DNA. In the same study we postulated that the CMA<sub>3</sub> fluorochrome could be used as a tool in routine laboratory analysis for the rapid screening of certain conditions of subfertility and infertility in man, as it seemed to allow an indirect visualization of protamine-deficient, nicked and partially denatured DNA. In this study we investigate the use of CMA<sub>3</sub> in relation to individual sperm morphology. Furthermore, we assess the relationship between CMA<sub>3</sub> fluorescence, in conjunction with morphology, and the

**Table I.** Distribution of the semen characteristics in treatment cycles of in-vitro fertilization (IVF) and subzonal insemination (SUZI) according to (a) sperm concentration and motility and (b) morphology

|                                                           | Sperm motility (%) |      |       |      |     |      |
|-----------------------------------------------------------|--------------------|------|-------|------|-----|------|
|                                                           | 0-20               |      | 21-50 |      | >50 |      |
|                                                           | IVF                | SUZI | IVF   | SUZI | IVF | SUZI |
| <b>Sperm concentration</b><br>( $\times 10^6/\text{ml}$ ) |                    |      |       |      |     |      |
| 0-5                                                       | 1                  | 5    | 1     | 6    | 0   | 2    |
| 6-20                                                      | 0                  | 4    | 0     | 7    | 2   | 0    |
| >20                                                       | 0                  | 1    | 6     | 4    | 21  | 1    |
| <b>Morphology</b><br>(% normal forms)                     |                    |      |       |      |     |      |
| 0-20                                                      |                    |      |       |      |     |      |
| 21-40                                                     | 4                  | 18   |       |      |     |      |
| >40                                                       | 17                 | 8    |       |      |     |      |
|                                                           | 10                 | 2    |       |      |     |      |

<sup>a</sup> No assessment in two cycles due to insufficient spermatozoa.

outcome of fertilization for patients being treated by routine IVF and SUZI.

## Materials and methods

### Patient characteristics and sperm preparation

Semen samples were all taken from 55 patients undergoing treatment for infertility at the Clinic for Infertility and Gynaecological Endocrinology-WHO Collaborating Centre, University Hospital of Geneva, Geneva, Switzerland. Ejaculated human spermatozoa were collected and the greater part prepared for routine IVF or SUZI. The criteria for selection of patients performing either procedure was: for IVF, an insemination droplet of at least 100 000 motile spermatozoa could be prepared, and for SUZI, <100 000 motile spermatozoa after preparation or patients having failed to achieve fertilization in at least two previous IVF attempts. Table I shows the semen characteristics for the 55 patients (61 cycles) making up the IVF and SUZI groups. Morphology was assessed according to World Health Organization criteria (1989) and progressive motility by visual appraisal using a Makler chamber.

IVF and SUZI were performed using the stimulation protocol and procedures previously published (Urner *et al.*, 1993; Sakkas *et al.*, 1994). Spermatozoa were prepared for both techniques by treating the sample with 3 mM pentoxifylline (Sigma Pharmaceuticals, Buchs, Switzerland) followed by selection using mini-Percoll gradient centrifugation (Ord *et al.*, 1990). From the remains of the semen sample, one slide was prepared for assessment of sperm morphology while the rest was washed in Dulbecco's  $\text{Ca}^{2+}$ - $\text{Mg}^{2+}$  free phosphate-buffered saline (PBS) and centrifuged at 170 g for 10 min. The procedure was repeated twice and the washed spermatozoa were fixed in methanol/glacial acetic acid 3:1, at 4°C, for 5 min and then spread on slides.

### Chromomycin A<sub>3</sub> staining and assessment of sperm morphology

For CMA<sub>3</sub> (Sigma) staining, each slide was treated for 20 min with 100  $\mu\text{l}$  of CMA<sub>3</sub> solution (0.25 mg/ml in McIlvane buffer, pH 7.0, containing 10 mM  $\text{MgCl}_2$ ). Slides were then rinsed in buffer and mounted with buffered glycerol. Fluorescence was performed using a Zeiss Photomikroskop III using a combination of exciter: dichroic: barrier filters of BP 436/10: FT 580: LP 470 and an A-Plan X20 objective lens. This lens allowed the use of both phase and fluores-

**Table II.** The mean percentage of spermatozoa positive to the CMA<sub>3</sub> fluorochrome stain according to sperm concentration and motility

|                                                           | No. of cycles | % CMA <sub>3</sub> fluorescence <sup>a</sup> |
|-----------------------------------------------------------|---------------|----------------------------------------------|
| <b>Sperm concentration</b><br>( $\times 10^6/\text{ml}$ ) |               |                                              |
| 0-5                                                       | 14            | 68.0 $\pm$ 18.1                              |
| 6-20                                                      | 13            | 59.8 $\pm$ 23.0                              |
| >20                                                       | 34            | 47.7 $\pm$ 16.5 <sup>b</sup>                 |
| <b>Motility (%)</b>                                       |               |                                              |
| 0-20                                                      | 11            | 71.5 $\pm$ 20.6                              |
| 21-40                                                     | 22            | 55.4 $\pm$ 21.8                              |
| >40                                                       | 28            | 48.0 $\pm$ 15.0 <sup>c</sup>                 |

<sup>a</sup> Values are means  $\pm$  SD.

<sup>b</sup>  $P < 0.05$  compared to 0-5  $\times 10^6/\text{ml}$  sperm concentration group.

<sup>c</sup>  $P < 0.05$  compared to 0-20% motility group.

cence. For each patient, a total of 100-150 spermatozoa were randomly observed on duplicate slides. For each single spermatozoon, head morphology (divided in three categories: normal, macrocephalic or amorphous) and fluorescence were assessed.

### Statistical analysis

The means in the different groups were transformed using an arcsin square root transformation and compared for statistical significance using one-way analysis of variance and Scheffé's *F*-test. A test of the correlation between the percentage of spermatozoa positive to the CMA<sub>3</sub> fluorochrome and head morphology per patient was performed using regression analysis.

## Results

### Chromomycin A<sub>3</sub> positivity in relation to sperm concentration, motility and morphology

#### Sperm concentration and motility

The mean percentage of spermatozoa fluorescent after CMA<sub>3</sub> treatment declined in relation to increased sperm concentration and motility (Table II). Patients with severe oligozoospermia or asthenozoospermia had a mean ( $\pm$ SD) of 68.0  $\pm$  18.0% and 71.5  $\pm$  20.6% of their spermatozoa fluorescing respectively. A distinct decline in spermatozoa quality was therefore associated with CMA<sub>3</sub> fluorescence.

#### Morphology

Although a decline in sperm number and motility was associated with increased CMA<sub>3</sub> fluorescence, a comparison of CMA<sub>3</sub> positivity and morphology in individual spermatozoa showed that apparently normal spermatozoa may possess hidden anomalies. By observing fluorescence and morphology in single sperm heads from the two groups of patients, we found that in all samples >75% of the spermatozoa displaying macrocephaly fluoresced brightly while ~50% of the spermatozoa classed as having an amorphous head shape fluoresced (Figure 1). The main difference between the treatment groups was seen in spermatozoa classed as having a normal shape. In patients undergoing routine IVF, a mean ( $\pm$ SD) of 38.2  $\pm$  19.2% of the morphologically normal spermatozoa fluoresced while in the male factor patients treated by SUZI 57.8  $\pm$  27.4% fluoresced; this was significant ( $P < 0.05$ ). In nine

out of 30 samples from male factor patients, >80% of all spermatozoa were fluorescent compared with only one of the IVF samples.

There was no correlation between the percentage of spermatozoa with abnormal head morphology and the percentage of spermatozoa showing fluorescence after CMA<sub>3</sub> staining (Figure 2). Therefore, although macrocephalic spermatozoa were nearly always fluorescent, spermatozoa with amorphous and normal heads vary in chromatin packaging. Samples

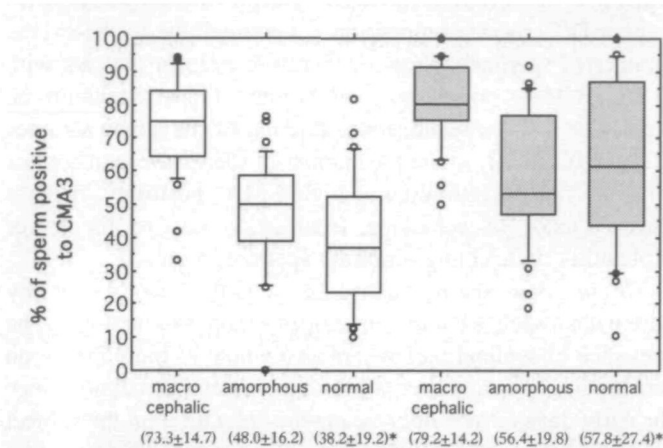

**Figure 1.** A box plot comparing the different types of sperm morphology to the percentage of spermatozoa positive to the chromomycin A<sub>3</sub> (CMA<sub>3</sub>) fluorochrome. The lower 25th and upper 75th percentiles are shown. Two groups are represented, normozoospermic patients ( $n = 31$ ) treated by routine in-vitro fertilization (IVF, open) and male factor patients ( $n = 30$ ) treated by subzonal insemination (SUZI, shaded). Individual spermatozoa were assessed for both morphology and CMA<sub>3</sub> fluorescence. The mean ( $\pm$  SD) percentage of spermatozoa positive for CMA<sub>3</sub> fluorescence in each group is given in parentheses. \*Percentage of spermatozoa with normal morphology and positive for CMA<sub>3</sub> fluorescence was significantly different ( $P < 0.05$ ) in samples from the IVF and SUZI groups of patients.

prepared from the same ejaculate and evaluated independently gave  $r$  values of 0.36 and 0.41 when comparing percentage of cells with abnormal head morphology and showing CMA<sub>3</sub> fluorescence for the IVF and SUZI patients respectively (Figure 2).

### **Chromomycin A<sub>3</sub> positivity in relation to fertilization, cleavage rates and pregnancy**

#### *In-vitro fertilization*

There was no association between CMA<sub>3</sub> fluorescence in all spermatozoa and fertilizing ability for patients being treated by routine IVF (data not shown). In seven cases where patients had <20% fertilization rates there was no difference in positivity of sperm to the CMA<sub>3</sub> fluorochrome when compared to cases with fertilization rates >20%. As in routine IVF there is a greater competition between spermatozoa, it could be expected that a motile morphologically normal spermatozoon would fertilize the oocyte. However, no relationship was found between fertilizing ability and CMA<sub>3</sub> fluorescence in morphologically normal spermatozoa in patients treated by routine IVF.

#### *Subzonal insemination*

In contrast to the lack of an association in IVF patients, male factor patients treated by SUZI had a significantly lower mean fertilization rate when their spermatozoa showed a high positivity to the CMA<sub>3</sub> fluorochrome. Ten SUZI patients had >70% of spermatozoa positive to the CMA<sub>3</sub> fluorochrome and had a significantly lower ( $P < 0.02$ ) fertilization rate; CMA<sub>3</sub> of >70%:  $24.9 \pm 15.9$  compared with CMA<sub>3</sub> of <70%:  $55.7 \pm 26.3$ . The same 10 patients also had >70% fluorescence in their morphologically normal spermatozoa, which was indicative of poor fertilizing ability when using SUZI (Table III).

#### *Embryo cleavage and pregnancies*

Once fertilization had occurred, there was no relationship between the ability of a fertilized oocyte to cleave and positivity

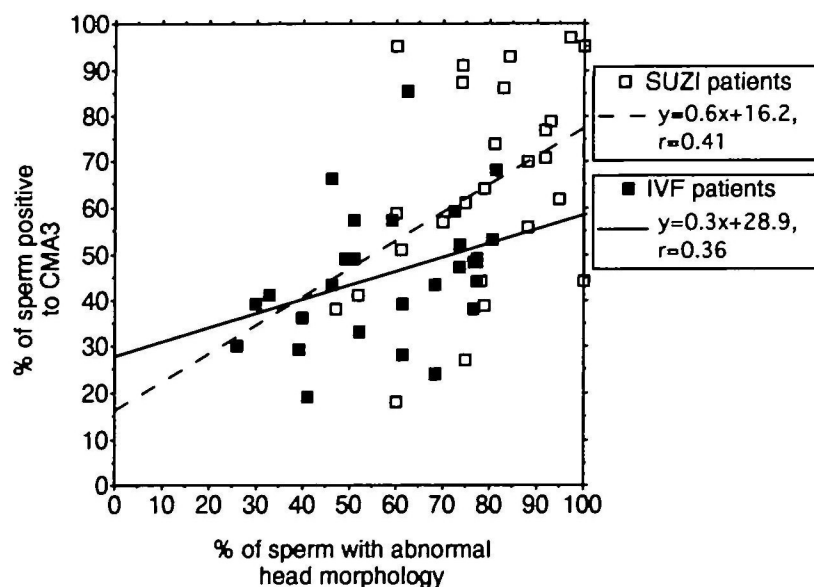

**Figure 2.** Correlation between the percentages of spermatozoa with abnormal head morphology and spermatozoa positive to the chromomycin A<sub>3</sub> (CMA<sub>3</sub>) fluorochrome. Regression equations are given for the normozoospermic patients ( $n = 31$ ) treated by routine in-vitro fertilization (IVF) and male factor patients ( $n = 30$ ) treated by subzonal insemination (SUZI).

**Table III.** Mean fertilization rate of sperm samples from men treated by subzonal insemination (SUZI) in relation to positivity of morphologically normal spermatozoa to the CMA<sub>3</sub> fluorochrome

| Percentage of morphologically normal sperm fluorescing | No. of cases <sup>a</sup> | Mean fertilization rate <sup>b</sup> |
|--------------------------------------------------------|---------------------------|--------------------------------------|
| 0–50                                                   | 10                        | 56.4 ± 25.2                          |
| 50–70                                                  | 7                         | 53.6 ± 30.2                          |
| > 70                                                   | 10                        | 24.9 ± 15.9 <sup>c</sup>             |

<sup>a</sup>Only cases which had more than four oocytes treated were included.

<sup>b</sup>Values are means ± SD.

<sup>c</sup>*P* < 0.02 compared to the 0–50 and 50–70 groups.

to the CMA<sub>3</sub> fluorochrome in either treatment group. Five of the 31 IVF cycles resulted in ongoing pregnancies; of the five pregnancies, four of the male partners showed CMA<sub>3</sub> fluorescence values of 20–40%, while one male had 86% of his spermatozoa fluorescing after CMA<sub>3</sub> staining. In the two ongoing pregnancies from the 30 SUZI cycles, the CMA<sub>3</sub> fluorescence was 62 and 77%. Although the numbers are limited, the results suggest that CMA<sub>3</sub> positivity is not related to embryo viability.

## Discussion

One of the central events of spermiogenesis is the substitution of the chromatin structural proteins by protamines, allowing a different structural organization to take place in the sperm nucleus (Courten and Loir, 1981; Balhorn, 1989; Ward and Coffey, 1991). Indeed, as reviewed by Ward and Coffey (1991), chromatin packaging in spermatozoa is very different from that of somatic cells; for example, the mouse sperm cell nucleus is 40-fold smaller than the nucleus of the mouse somatic cell. Due to the tight packaging afforded by the protamines, any modification or absence of these proteins could lead to an anomaly in the packaging process of sperm nuclei and influence sperm quality and fertilizing capacity.

The different models proposed for the binding of protamines to DNA in spermatozoa (Balhorn, 1982; Subirana, 1991) postulate that the polyarginine segment of protamine binds in the minor groove of DNA, cross-linking and neutralizing the phosphodiester backbone. The CMA<sub>3</sub> fluorochrome is also believed to access DNA in the minor groove of the DNA helix (Behr *et al.*, 1969; Berman *et al.*, 1985), a positional preference that can make it a competitor to protamines. CMA<sub>3</sub> has previously been shown to be a useful tool to indicate protamine-depleted spermatozoa (Bianchi *et al.*, 1993). In contrast to the homogeneity of mature mouse spermatozoa, ejaculated human spermatozoa samples were found to exhibit a wide variation both in their responsiveness to the CMA<sub>3</sub> fluorochrome and in the presence of endogenous nicks in the DNA (Bianchi *et al.*, 1993; Sakkas *et al.*, 1995).

Treatment of human sperm samples with protamines eliminates CMA<sub>3</sub> positivity and prevents the identification of endogenous DNA nicks by in-situ nick translation, a technique that reveals damaged DNA (Bianchi *et al.*, 1993; Manicardi *et al.*, 1995). We have now investigated the relationship between CMA<sub>3</sub> positivity and fertilizing capacity in spermatozoa from

two populations of patients undergoing IVF and SUZI treatment and found interesting differences in respect to their response to the CMA<sub>3</sub> fluorochrome. In this study we show that the CMA<sub>3</sub> fluorescence provides evidence of: (i) a population of spermatozoa that exhibit normal head morphology but possess loosely packaged chromatin; and (ii) a positive correlation between fertilization failure and CMA<sub>3</sub> fluorescence in morphologically normal spermatozoa in the SUZI treatment, and not in the routine IVF group. Such a difference is most likely related to the different methods of achieving fertilization. In routine IVF, sperm competition is maximal due to the excess number of spermatozoa used; therefore even in patients with a high CMA<sub>3</sub> positivity enough normal sperm should be present to achieve fertilization. In contrast, in semen samples selected for SUZI, where the number of spermatozoa in contact with the oocyte is limited, a high CMA<sub>3</sub> positivity yields a lower chance of achieving fertilization due to the lower probability of selecting a normal spermatozoon.

To this day, sperm quality has mainly been judged by parameters such as number, motility, and morphology. The influence of seminal parameters as a whole or individually on fertility has been a matter of investigation and discussion since the early days of infertility treatment. Literature on the subject is contradictory and results can vary extensively according to methodology of analysis, dyes utilised, interpretation criteria of morphology and technology available. Nonetheless, Bestoffe *et al.* (1982), showed an inverse correlation between percentage of abnormal sperm forms and spontaneous pregnancies in a retrospective study in subfertile couples. This debate has gained new vitality since the new assisted reproduction technologies provided a much more precise tool for evaluation of fertilization rates. Although a proper consensus has not yet been established, it has become widely accepted that normal parameters, defined according to WHO criteria (1989) are associated with high percentages of fertilization and cleavage rates in IVF. Furthermore, many authors have concentrated their attention on the predictive value of morphology (Kruger *et al.*, 1986; Pousette *et al.*, 1986), and it is felt that normal morphology is indicative of normal function, while high levels of morphologically abnormal spermatozoa in the ejaculate are associated with a reduced fertilizing potential (Oehninger *et al.*, 1988). When we compared the morphology and CMA<sub>3</sub> fluorescence in individual spermatozoa, we found a high frequency of CMA<sub>3</sub> positive nuclei among macrocephalic spermatozoa in both treatment groups. This confirms data known on other fluorescent dyes, in particular Acridine Orange, where access to the DNA was achieved only or mostly in cases of decondensed or damaged chromatin (Evenson *et al.*, 1980; 1991; Foresta *et al.*, 1992; Molina *et al.*, 1995; Sailer *et al.*, 1995). Our observations also confirm that macrocephaly is associated with decondensation. Moreover, this is further evidence of the protamine-depleted status of macrocephalic spermatozoa, as CMA<sub>3</sub> is unable to access DNA in the presence of protamines and normally formed disulphide bonds (Bianchi *et al.*, 1993; Kvist, 1982). The fact that fluorescence was still present in the 'amorphous' category but was reduced to 50% probably reflects the fact that this group contained several, and probably

very different head defects, not all of which correspond to a decondensed status of the nuclear chromatin.

In our opinion the most interesting result was the statistically significant difference in fluorescence of normal spermatozoa between the two groups examined, casting a shadow on the value of assessing normal morphology, particularly in the cases of oligoasthenoteratozoospermia (OAT). As proposed by Bartoov *et al.* (1994) such patients may require a more complete sperm evaluation, as normal forms observed by light microscopy do not fully express the anatomical capability hidden in the sperm morphology. Engh *et al.* (1992) also found in a cytofluorimetric evaluation of 100 male patients undergoing investigations because of infertility that patients with severe OAT presented a higher percentage of fluorescent cells in comparison with normozoospermic patients. Our data confirm this *in situ* with a direct comparison, per individual cell, of fluorescence and morphology. Interestingly, one third of the samples of SUZI patients (usually patients with OAT) presented >80% of fluorescent cells, while only one out of 31 of the IVF patients presented the same features. This suggests that the difference does not only rely on a decrease of the classical sperm parameters but on a defect in the packaging of chromatin, which can affect all the spermatozoa produced by testicular germinal tissue.

This highlights the importance of detecting this population of patients prior to treatment by IVF, as a spermatozoon possessing decondensed chromatin may be unable to achieve syngamy, even upon penetration of the oolemma membrane. When we compared the results of fluorescence to fertilizing capacity in the SUZI patients, we found data to reinforce this hypothesis, as the fertilization rate declines to nearly 20% when a very high number of spermatozoa are fluorescent, a situation that could be taken into account when deciding upon treatment. The fact that cleavage rate is apparently not influenced confirms that the crucial moment is at intra-oocyte decondensation and/or disturbances in its occurrence with all the subsequent processes such as protamine elimination and substitution by histones. Although this result has been observed using the SUZI technique, its relevance to the use of intracytoplasmic sperm injection (ICSI) as a treatment of male factor infertility awaits resolution.

The results from this study suggest that CMA<sub>3</sub> could become a useful tool for evaluation of male factor patients prior to infertility treatment. CMA<sub>3</sub> will distinguish decondensed, protamine-depleted spermatozoa. Moreover, CMA<sub>3</sub> is also useful in identifying DNA-damaged sperm cells as shown by the presence of endogenous nicks in many decondensed CMA<sub>3</sub> positive nuclei (Manicardi *et al.*, 1995). This would make it possible to screen for those patients whose spermiogenesis has resulted in a sperm population containing intrinsic anomalies in the nuclei, regardless of sperm morphology.

## Acknowledgements

We acknowledge the technical assistance of Kirsten Hebin and Nicole Jaquenoud and the statistical advice of Dr Tim Farley, Human Reproduction Program, World Health Organization, Geneva, Switzerland. This work was supported by the Fonds National Suisse

(Grant no. 31.33787.92). P.G. Bianchi was supported by the Fonds National Suisse Score Program.

## References

- Balhorn, R. (1982) A model for the structure of chromatin in mammalian sperm. *J. Cell. Biol.*, **93**, 298–305.
- Balhorn, R. (1989) Mammalian protamines: Structures and molecular interactions. In Adolph, K.W. (ed.), *Molecular Biology of Chromosome Function*. Springer Verlag, New York, Berlin, Heidelberg, pp. 366–395.
- Bartoov, B., Eltes, F., Pansky, M., Langzam, J., Reichart, M. and Soffer, Y. (1994) Improved diagnosis of male infertility potential via a combination of quantitative ultramorphology and routine semen analyses. *Hum. Reprod.*, **9**, 2969–2075.
- Behr, W., Honikel, K. and Hartmann, G. (1969) Interaction of the RNA polymerase inhibitor chromomycin with DNA. *Eur. J. Biochem.*, **9**, 82–92.
- Berman, E., Brown, S.C., James, T.L. and Shafer, L.H. (1985) NMR studies of chromomycin A3 interaction with DNA. *Biochemistry*, **24**, 6887–6893.
- Bestoffe, E., Serup, J. and Rebbe, H. (1982) Relation between morphologically abnormal spermatozoa and pregnancies obtained during a twenty-year follow-up period. *Int. J. Androl.*, **5**, 379–386.
- Bianchi, P.G., Manicardi, G.C., Bizzaro, D., Bianchi, U. and Sakkas, D. (1993) Effect of deoxyribonucleic acid protamination on fluorochrome staining and *in situ* nick-translation of murine and human spermatozoa. *Biol. Reprod.*, **49**, 1083–1088.
- Courtens, J. and Loir, M. (1981) A cytochemical study of nuclear changes in boar, bull, goat, mouse, rat and stallion spermatids. *J. Ultrastruct. Res.*, **74**, 327–340.
- Engh, E., Clausen, O.P.F., Scholberg, A., Tollefsrud, A. and Purvis, K. (1992) Relationship between sperm quality and chromatin condensation measured by sperm DNA fluorescence using flow cytometry. *Int. J. Androl.*, **15**, 407–415.
- Evenson, D.P., Darzynkiewicz, Z. and Melamed, M.R. (1980) Relation of mammalian sperm chromatin heterogeneity to fertility. *Science*, **240**, 1131–1133.
- Evenson, D.P., Jost, L.K., Baer, R.K., Turner, T.W. and Schrader, S.M. (1991) Individuality of DNA denaturation patterns in human sperm as measured by the sperm chromatin structure assay. *Reprod. Toxicol.*, **7**, 297–304.
- Foresta, C., Zorzi, M., Rossato, M. and Varotto, A. (1992) Sperm nuclear instability and staining with aniline blue: abnormal persistence of histones in spermatozoa in infertile men. *Int. J. Androl.*, **15**, 330–337.
- Jager, S. (1990) Sperm nuclear stability and male infertility. *Arch. Androl.*, **25**, 253–259.
- Jeyendran, R.S., Van der Ven, H.H., Rachagan, S.P., Perez-Peleaz, M. and Zaneveld, L.J.D. (1989) Semen quality and in-vitro fertilization. *Aust. N.Z. Obstet. Gynecol.*, **29**, 168–172.
- Kruger, T.F., Menkueld, R., Stander, F.S.H., Lombard, C.J., Van der Merwe, J.P., Van Zyl, J.A. and Smith, K. (1986) Sperm morphology features as a prognostic factor in *in vitro* fertilization. *Fertil. Steril.*, **46**, 1118–1123.
- Kvist, U. (1982) Spermatozoal thiol-disulphide interaction: A possible event underlying physiological sperm nuclear chromatin decondensation. *Acta Physiol. Scand.*, **115**, 503–505.
- Liu, D.Y., Duplessis, Y.P., Nayudu, P.L., Johnston, W. and Baker, H. (1988) The use of *in vitro* fertilization to evaluate putative tests of human sperm function. *Fertil. Steril.*, **49**, 272–277.
- Mahadevan, M. and Trounson, A.O. (1984) The influence of seminal characteristics on the success rate of human *in vitro* fertilization. *Fertil. Steril.*, **42**, 400–405.
- Manicardi, G.C., Bianchi, P.G., Pantano, S., Azzoni, P., Bizzaro, D., Bianchi, U. and Sakkas, D. (1995) The presence of endogenous nicks in DNA of ejaculated human spermatozoa and its relationship to chromomycin A<sub>3</sub> accessibility. *Biol. Reprod.*, **52**, 864–867.
- Molina, J., Castilla, J.A., Gil, T., Hortas, M.L., Vergara, F. and Herruzo, A. (1995) Influence of incubation on the chromatin condensation and nuclear stability of human spermatozoa by flow cytometry. *Hum. Reprod.*, **10**, 1280–1286.
- Monaco, P.J. and Rasch, E.M. (1982) Differences in staining with DNA-specific fluorochromes during spermiogenesis. *J. Histochem. Cytochem.*, **30**, 585.
- Oehninger, S., Acosta, A.A., Morshedi, M., Veek, L., Swanson, R.J., Simmons, K. and Rosenwaks, Z. (1988) Corrective measures and pregnancy outcome in *in vitro* fertilization in patients with severe sperm morphology abnormalities. *Fertil. Steril.*, **50**, 283–287.
- Ord, T., Patrizio, P., Marelllo, E., Balmaceda, J.P. and Asch, R.H. (1990) Mini-

- Percoll: a new method of sperm preparation for IVF in severe male factor infertility. *Hum. Reprod.*, **6**, 987-989.
- Pousette, A., Akerlof, E., Rosenborg, L. and Fredricsson, B. (1986) Increase in progressive motility and improved morphology of human spermatozoa following their migration through Percoll gradients. *Int. J. Androl.*, **9**, 1-13.
- Sailer, B.L., Jost, L.K. and Evenson, D.P. (1995) Mammalian sperm DNA susceptibility to *in situ* denaturation associated with the presence of DNA strand breaks as measured by the terminal deoxynucleotidyl transferase assay. *J. Androl.*, **16**, 80-87.
- Sakkas, D., Jacquenoud, N., Campana, A. and Leppens, G. (1994) Comparison of results after *in vitro* fertilized human embryos are cultured in routine medium and in coculture on Vero cells: a randomized study. *Fertil. Steril.*, **61**, 521-525.
- Sakkas, D., Manicardi, G., Bianchi, P.G., Bizzaro, D. and Bianchi, U. (1995) Relationship between the presence of endogenous nicks and sperm chromatin packaging in maturing and fertilizing mouse spermatozoa. *Biol. Reprod.*, **52**, 1149-1155.
- Subirana, J.A. (1991) Protein-DNA interactions in spermatozoa. In *Comparative Spermatology 20 Years Later*. Serono Symposia Publications, Vol 75. Raven Press, New York, pp. 89-92.
- Urner, F., Bianchi, P.G., Campana, A. and Sakkas, D. (1993) Evidence of sperm entry into assumed unfertilized human oocytes after sub-zonal sperm microinjection. *Hum. Reprod.*, **12**, 2167-2173.
- Ward, W.S. and Coffey, D.S. (1991) DNA packaging and organization in mammalian spermatozoa: comparison with somatic cells. *Biol. Reprod.*, **44**, 569-574.
- Wolf, J.P., Ducot, B., Kunstmann, J.M., Frydman, R. and Jouannet, P. (1992) Influence of sperm parameters on outcome of subzonal insemination in the case of previous IVF failure. *Hum. Reprod.*, **7**, 1407-1413.
- World Health Organization (1989) *Laboratory Manual for the Examination of Human Semen and Semen-Cervical Mucus Interaction*. 3rd edn. Cambridge University Press, Cambridge.

Received on May 30, 1995; accepted on August 4, 1995
